# Supplementary material for: Berberine Overcomes Gemcitabine-Associated Chemoresistance through Regulation of Rap1/PI3K-Akt Signaling in Pancreatic Ductal Adenocarcinoma
Source: MDPI journal article supplement (doi:10.3390/ph15101199), 2022-09-28
Supplement: s1 [file s1]

## SUPPLEMENTARY FIGURES

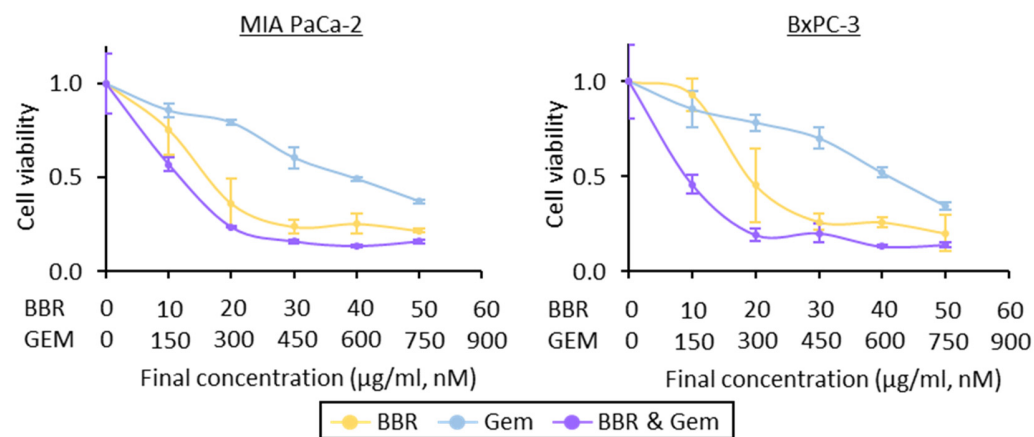

**Supplementary Figure S1:** Drug dose response curves determined by CCK-8 assays comparing cell viability following treatment with BBR, Gem and their combination for 48 hours in parental PDAC cells. Error bars are the mean  $\pm$  SD. PDAC, pancreatic ductal adenocarcinoma; BBR, Berberine; Gem, Gemcitabine; CCK-8, Cell Counting Kit-8; SD, standard deviation.

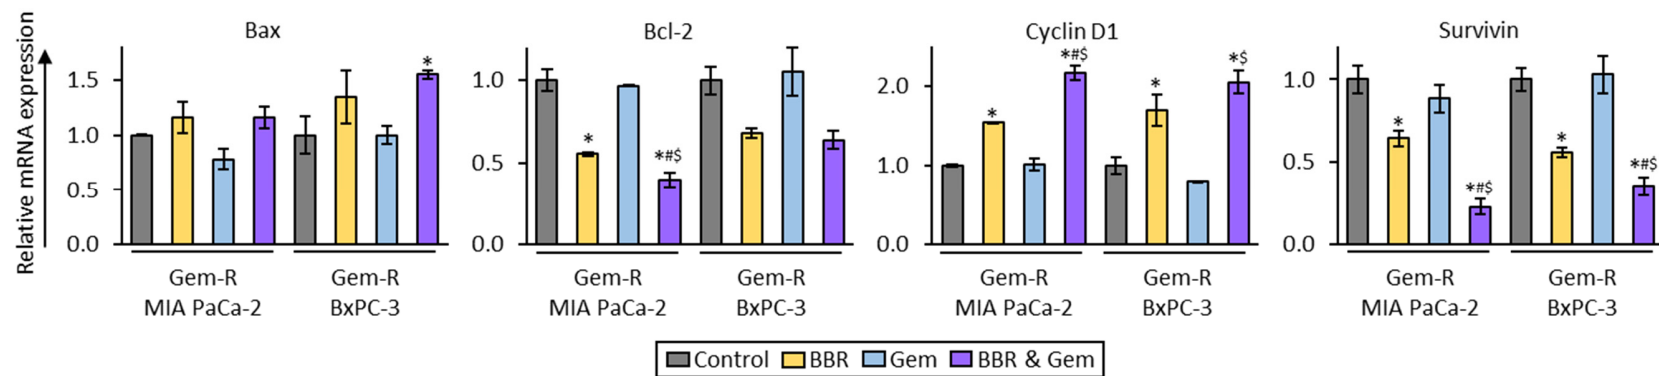

**Supplementary Figure S2:** qRT-PCR analysis of apoptosis-related genes (Bax, Bcl-2, Cyclin D1, and Survivin) in Gem-R PDAC cells following treatment with BBR, Gem, and their combination for 48 hours. Relative expression was calculated using  $\beta$ -Actin mRNA expression as an internal control. The average (column)  $\pm$  SD is indicated (\* $P < 0.05$  vs control, # $P < 0.05$  vs BBR, \$ $P < 0.05$  vs Gem). Gem-R, gemcitabine resistant; PDAC, pancreatic ductal adenocarcinoma; SD, standard deviation.

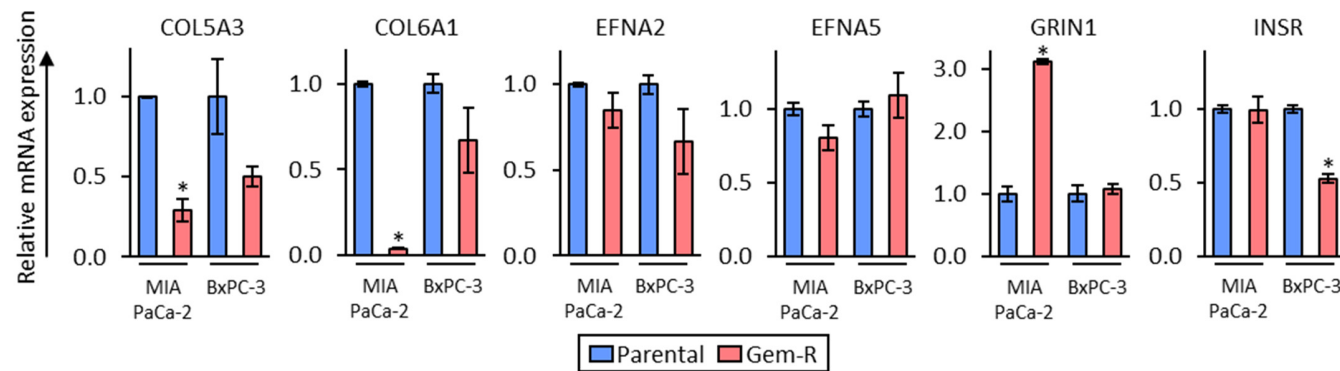

**Supplementary Figure S3:** qRT-PCR analysis of differentially expressed genes of Rap1/PI3K-Akt signaling pathway in parental and Gem-resistant PDAC cells. Relative expression was calculated using  $\beta$ -Actin mRNA expression as an internal control. The average (column)  $\pm$  SD is indicated (\* $P < 0.05$ ). Gem-R, gemcitabine resistant; PDAC, pancreatic ductal adenocarcinoma; SD, standard deviation.

**Supplementary Table S1:** Primer sequences and their PCR conditions in this study

| Gene             | Sense                   | Antisense               | Size of the<br>PCR<br>products<br>(bp) | Annealing<br>temp (°C) | GenBank<br>accession No |
|------------------|-------------------------|-------------------------|----------------------------------------|------------------------|-------------------------|
| <i>COL5A3</i>    | GTGGCCGTCAGCATAGATGG    | TGAATGTCTCCCTCGAAAGTCTT | 158                                    | 60                     | NM_015719               |
| <i>COL6A1</i>    | ACACCGACTGCGCTATCAAG    | CGGTCACCACAATCAGGTACTT  | 90                                     | 60                     | NM_001848               |
| <i>CSF3</i>      | GCTGCTTGAGCCAACTCCATA   | GAACGCGGTACGACACCTC     | 285                                    | 60                     | NM_000759               |
| <i>EFNA1</i>     | TCAGGCCCATGACAATCCAC    | GTGACCGATGCTATGTAGAACC  | 79                                     | 60                     | NM_004428               |
| <i>EFNA2</i>     | CGGTGGAGGTGAGCATCAAT    | AGCGGCGCCCCATAGT        | 61                                     | 60                     | NM_001405               |
| <i>EFNA5</i>     | CTACATGGTGAACTTTGATGGCT | GAGGCCGGTTACATTCCCA     | 80                                     | 60                     | NM_001962               |
| <i>GRIN1</i>     | ACGCCATCCTAGTTAGCCATC   | GCACGGGTATGCGGTAGAAG    | 93                                     | 60                     | NM_021569               |
| <i>INSR</i>      | AAGTGCATCCCTGAGTGTCC    | ATTGTTGCCTCCTCGAATGT    | 201                                    | 60                     | NM_000208               |
| <i>ITGB5</i>     | GGAAGTTCGGAACAGAGGGT    | CTTTCGCCAGCCAATCTTCTC   | 106                                    | 60                     | NM_002213               |
| <i>ITGB8</i>     | GTGAAAGTCATATCGGATGGCG  | GCTATCAAGAGCGAGATGAGACG | 86                                     | 60                     | NM_002214               |
| <i>MAP2K6</i>    | AAACGGCTACTGATGGATTTGG  | CAGTGCGCCATAAAAGGTGAC   | 78                                     | 60                     | NM_002758               |
| <i>MYB</i>       | ATCTCCCGAATCGAACAGATGT  | TGCTTGGCAATAACAGACCAAC  | 157                                    | 60                     | NM_005375               |
| <i>PLCE1</i>     | CAACGCTGTCATGGAGTTCTT   | TGGTCTCAATATCAGACTGGTCC | 89                                     | 60                     | NM_016341               |
| <i>RASSF5</i>    | GGGCATGAACTGAGTGAAGA    | TGGCATCATAGATGGACTGGG   | 116                                    | 60                     | NM_182665               |
| <i>Bax</i>       | CCAGCTCTGAGCAGATCATG    | TCAGCCCATCTTCTCCAGA     | 392                                    | 60                     | NM_138763               |
| <i>Bcl-2</i>     | GGTGCCACCTGTGGTCCACCTG  | CTTCACTGTGGCCAGATAGG    | 459                                    | 60                     | NM_000633               |
| <i>Cyclin D1</i> | ACCTGGATGCTGGAGGTCT     | GCTCCATTTCAGCAGCTC      | 241                                    | 60                     | NM_053056               |
| <i>Survivin</i>  | TGCCTGGCAGCCCTTTC       | ATGAAGCCAGCCTCGGC       | 108                                    | 60                     | NM_001168               |
| <i>β-actin</i>   | AGAGCTACGAGCTGCCTGAC    | AGCACTGTGTTGGCGTACAG    | 184                                    | 60                     | NM_001101               |
